# Supplementary material
Source: PubMed Central journal article supplement (PMC3947717)
Supplement: NIHMS553986-supplement-Supplementary_Figure_1A.pdf [file NIHMS553986-supplement-Supplementary_Figure_1A.pdf]

Supplementary Figure 1A for McCormack WM, Jr., Seiler MP, Bertin TK, Ubhayakar K, Palmer DJ, Ng P, Nichols TC and Lee B. Helper-dependent adenoviral gene therapy mediates long-term correction of the clotting defect in the canine hemophilia A model. *J Thromb Haemost.* 2006;4:1218-1225. [PMID:16706963]

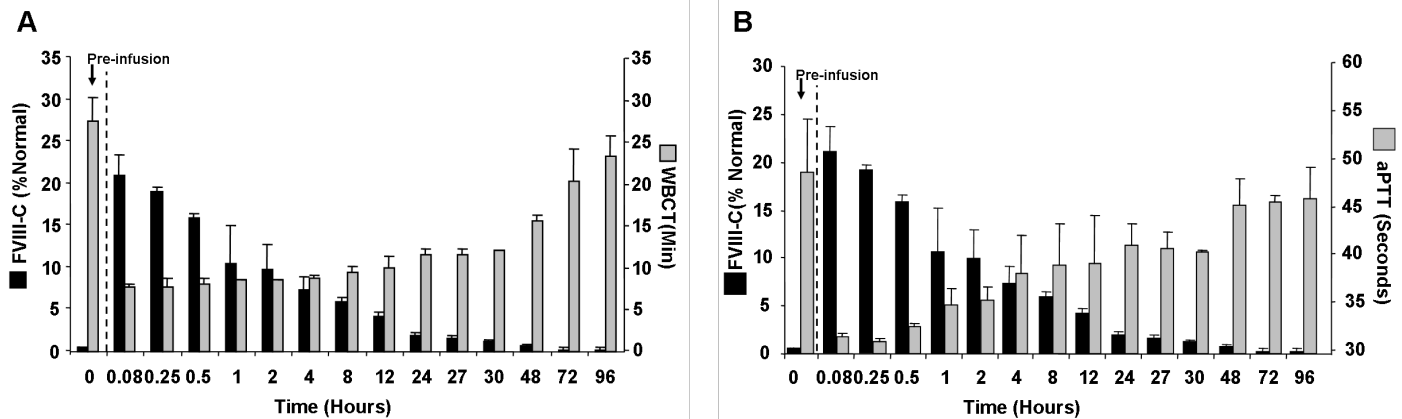

**Figure 1. WBCT and aPTT fall-off levels after infusion of recombinant FVIII.** FVIII naïve dogs were administered recombinant human FVIII, human BDD FVIII to plateau antigen levels of 20% normal. (A) Subsequent fall-off of whole blood clotting time (WBCT) and (B) activated partial thromboplastin time (aPTT) were measured at the indicated time points. Normal canine aPTT= 36-39 seconds. Normal WBCT =8-12 minutes.
